# Supplementary material
Source: PubMed Central journal article supplement (PMC470727)

**Fig. 5.** Derivation of elasticity of a semi-flexible polymer: (A) A single inextensible semiflexible filament with a contour length of  $l_c$ . (a) At absolute zero temperature ( $T = 0$ ), where thermal effects vanish, the end-to-end distance,  $l$ , of a semiflexible polymer equals  $l_c$ . (b) For  $T > 0$ , the filament undergoes thermal fluctuation of a magnitude  $h$ , and  $l$  contracts by  $\Delta'$  due to the thermal bending such that  $l = l_c - \Delta'$ . The corresponding bending energy is  $U_B \sim \kappa_0 l (h/l^2)^2$ , where  $\kappa_0$  is the filament bending rigidity. (c) In the presence of an applied extensional force,  $F$ , the contracted filament extends by  $\delta$  with the stretching energy of  $U_F \sim Fl\varepsilon \sim Fh^2/l$ , where  $\varepsilon$  is the net strain of the filament due to both the bending and stretching,  $\varepsilon = (\Delta' - \delta)/l_c$ . The elastic energy due to bending and stretching must balance the thermal energy by equipartition such that  $U_B + U_F \sim (\kappa/l^2 + F)\varepsilon l \sim k_B T$ . This energy balance equation can be rewritten for  $\varepsilon \sim (l^2/l_p - Fl^4/k_B T l_p^2)/l$  with the persistence length,  $l_p = \kappa/k_B T$ , yielding the lateral displacements  $\Delta' \sim l^2/l_p$  and  $\delta \sim Fl^4/k_B T l_p^2$ ; thus, the linear force-extension is  $F \sim (\kappa^2/k_B T l^4)\delta$ . (B) For a cross-linked network characterized by a pore size  $\xi$ , the stress  $\sigma$  is defined by  $\sigma \sim F/\xi^2$  and the imposed strain is  $\gamma \sim \delta/l_c$ , where  $l_c$  is now the distance between cross-links. This calculation leads to the network elastic modulus  $G' \sim \sigma/\gamma \sim \kappa^2/(k_B T \xi^2 l_c^3)$ .

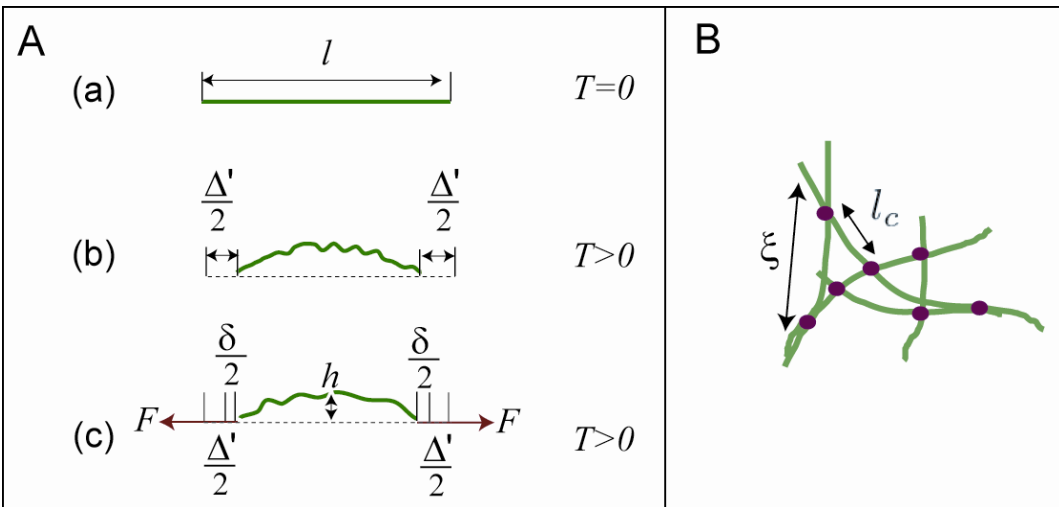

Supplement: pnas_101_26_9636__1.pdf [file pnas_101_26_9636__1.pdf]
